# Supplementary material for: Regulation of cargo-selective endocytosis by dynamin 2 GTPase-activating protein girdin
Source: PubMed Central journal article supplement — EMBO J. 2014 Jul 24;33(18):2098–112. doi: 10.15252/embj.201488289 (PMC4195775; doi:10.15252/embj.201488289), 2014-07-24
Supplement: embj0033-2098-sd3.pdf [file embj0033-2098-sd3.pdf]

**Supplementary Video S1. CCP formation in BS-C-1 cells expressing LCa-GFP and mCherry-NT under the observation by TIRF microscopy.**

BS-C-1 cells stably expressing LCa-GFP were grown on a glass-bottom dish and transfected with mCherry-NT. The time-lapse imaging was performed with a TIRF microscope. Images were acquired for 120 frames at 5 sec interval. Playback speed is 50 × real time (100 msec/frame). A box inset (revealing enlarged CCP) shows the colocalization of girdin NT and CCPs.
